# Supplementary material for: Myc and Ras oncogenes engage different energy metabolism programs and evoke distinct patterns of oxidative and DNA replication stress
Source: PubMed Central journal article supplement — Mol Oncol. 2014 Nov 15;9(3):601–16. doi: 10.1016/j.molonc.2014.11.001 (PMC5528704; doi:10.1016/j.molonc.2014.11.001), 2014-11-15
Supplement: MOL2-9-601-s001.pdf [file MOL2-9-601-s001.pdf]

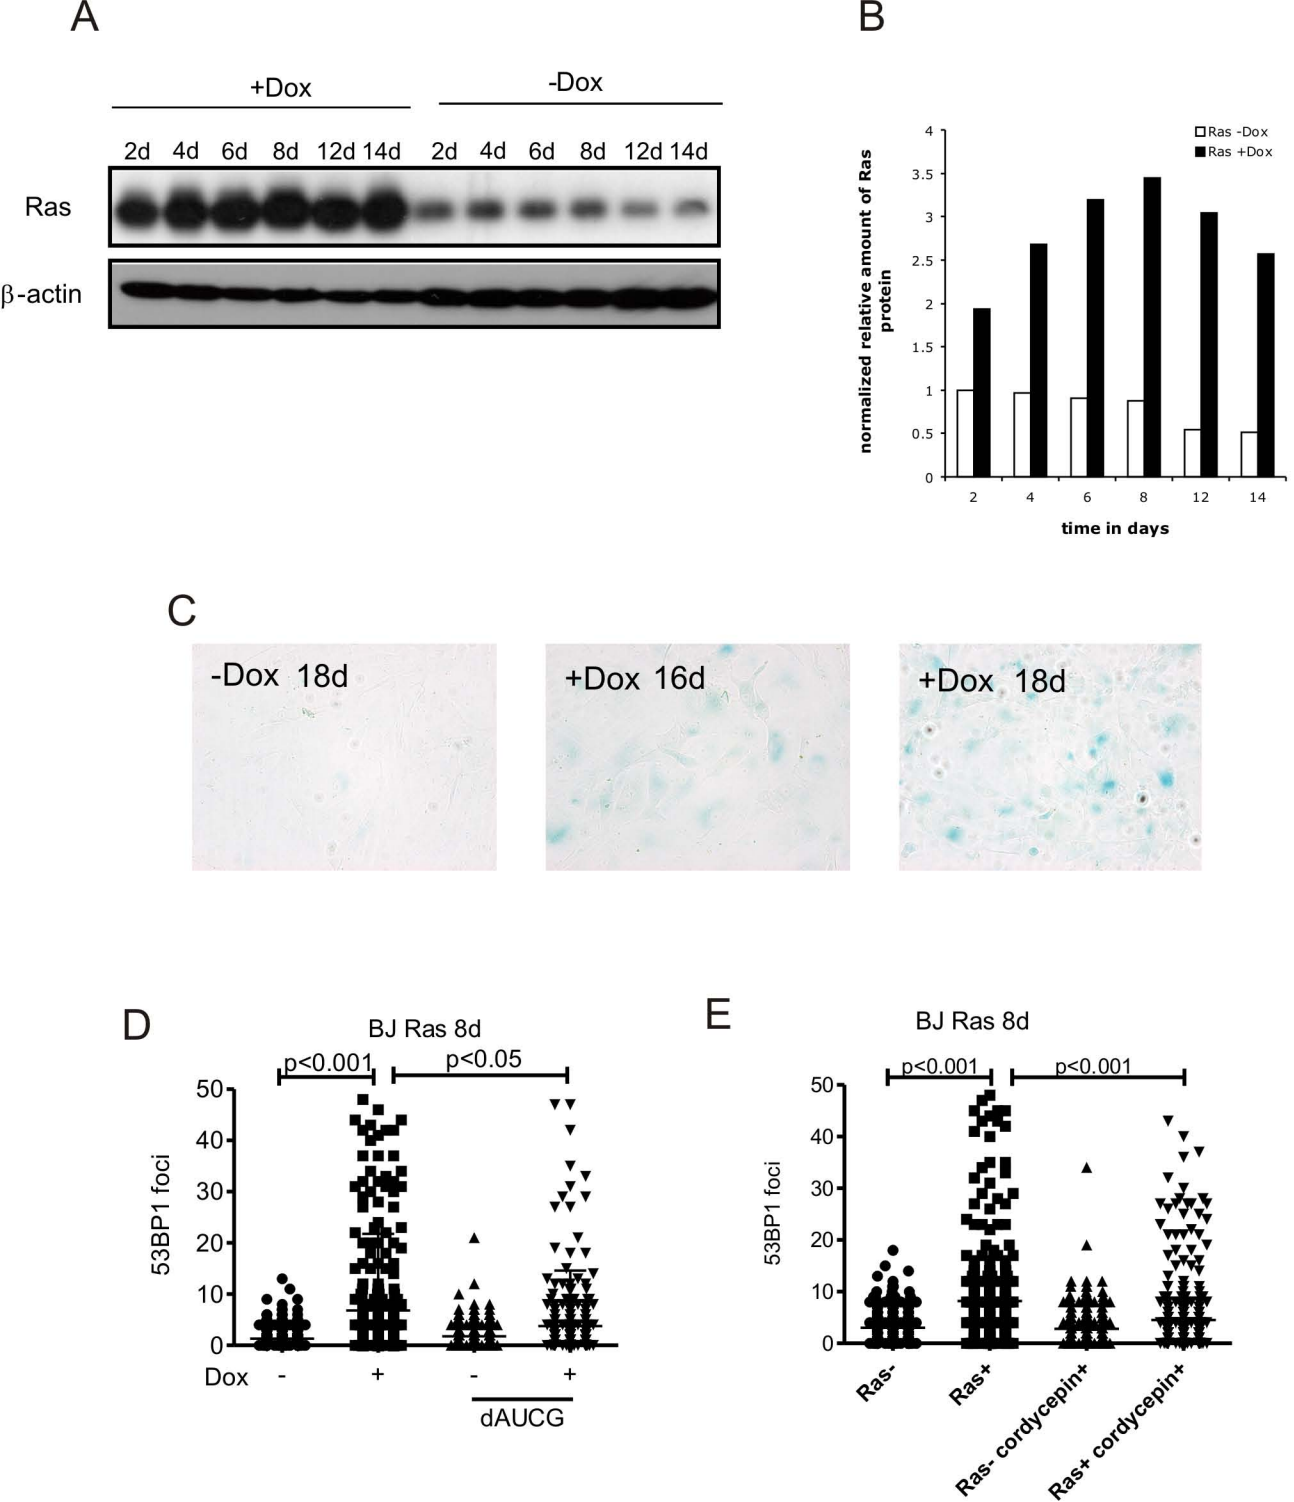

Supplemental Fig 1.

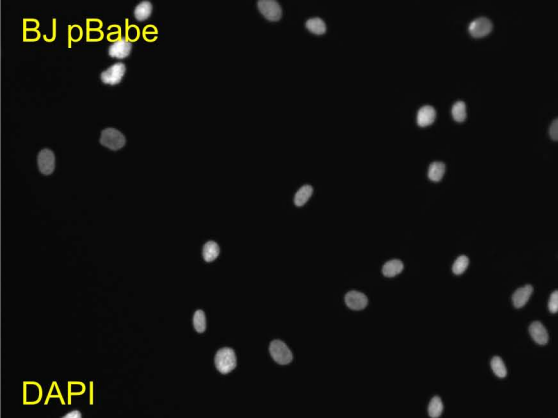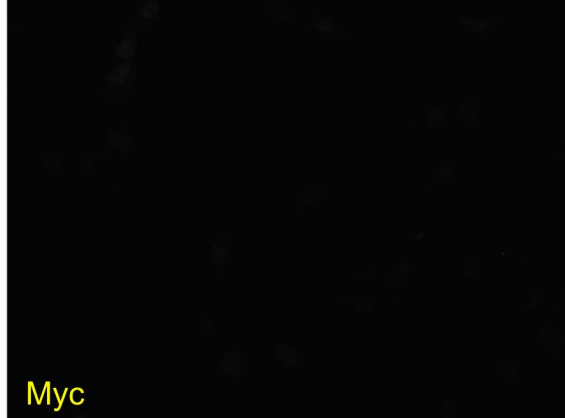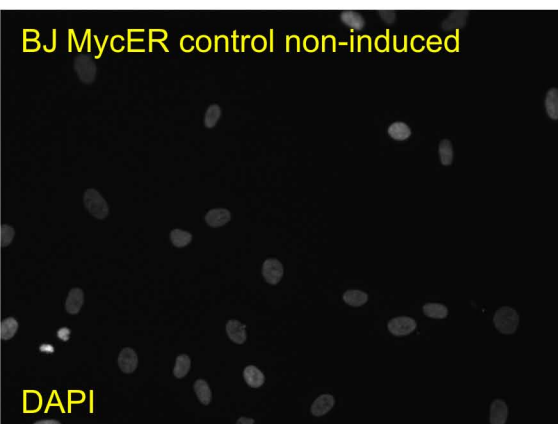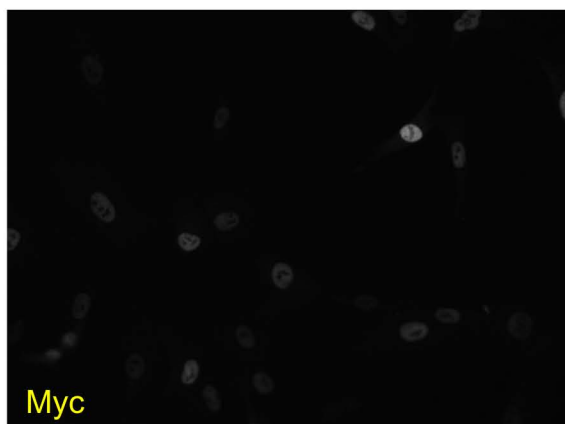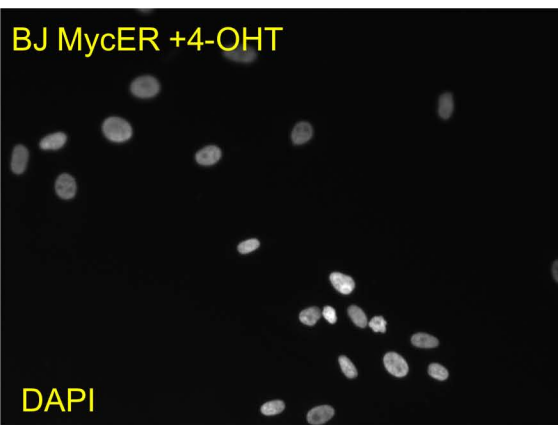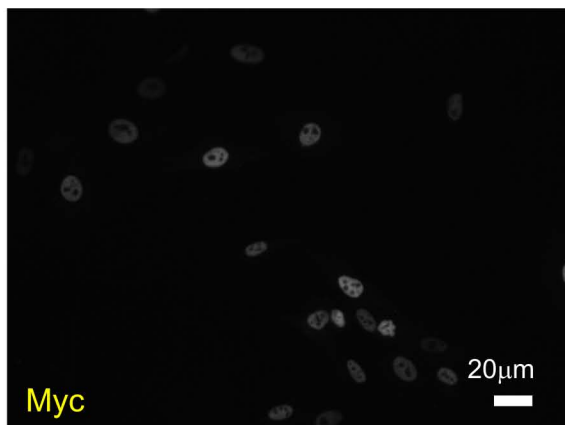

Supplemental Fig 2.

A

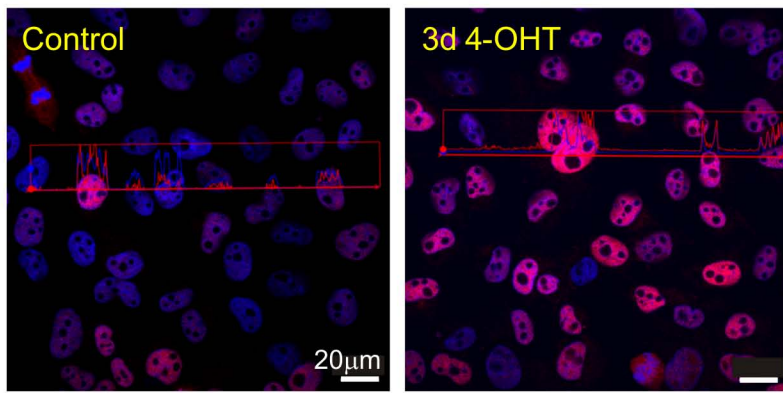

B

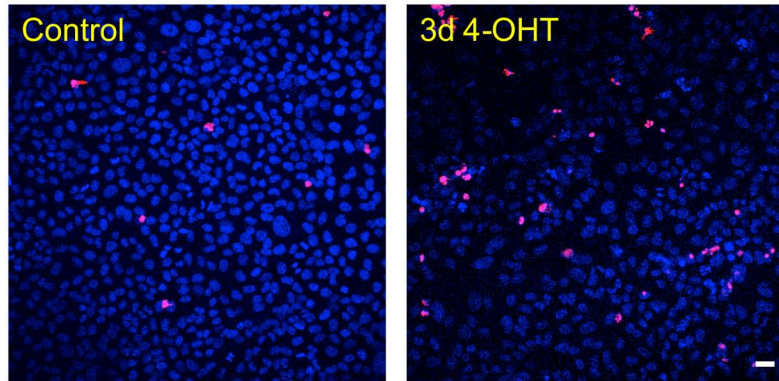

C

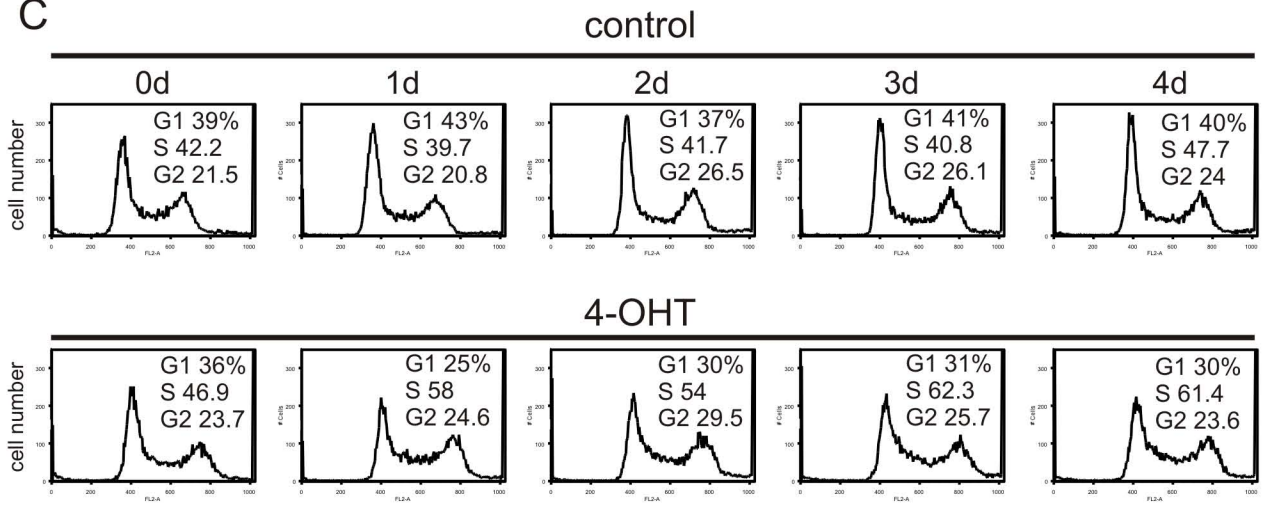

D

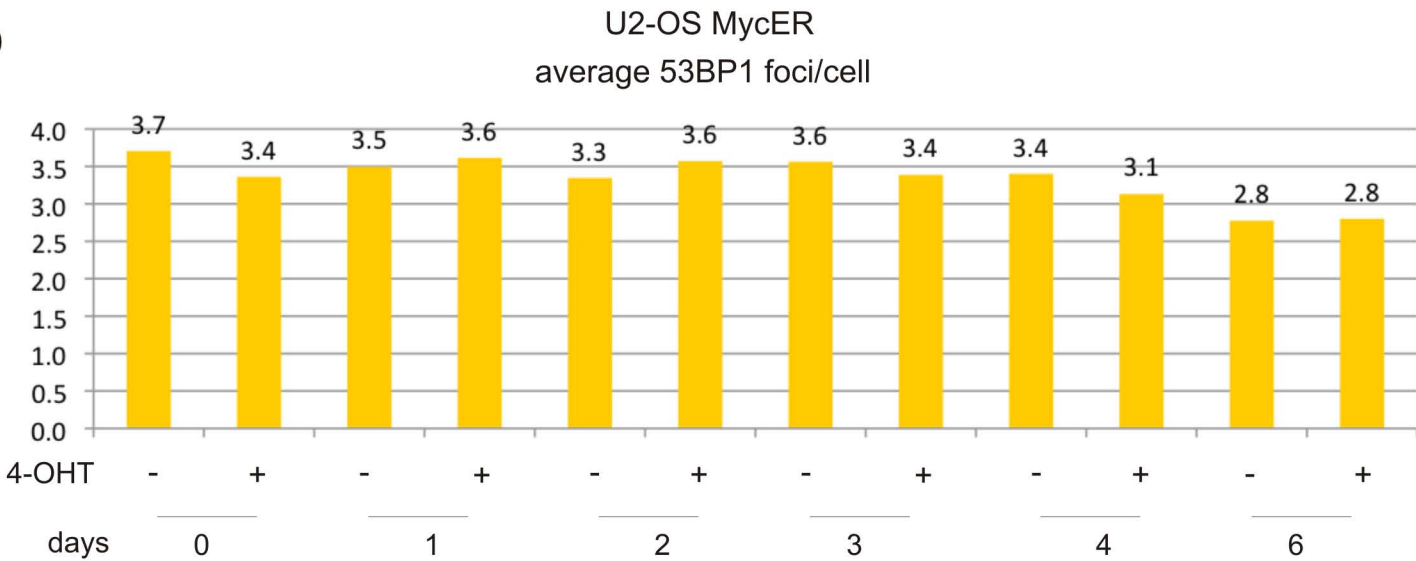

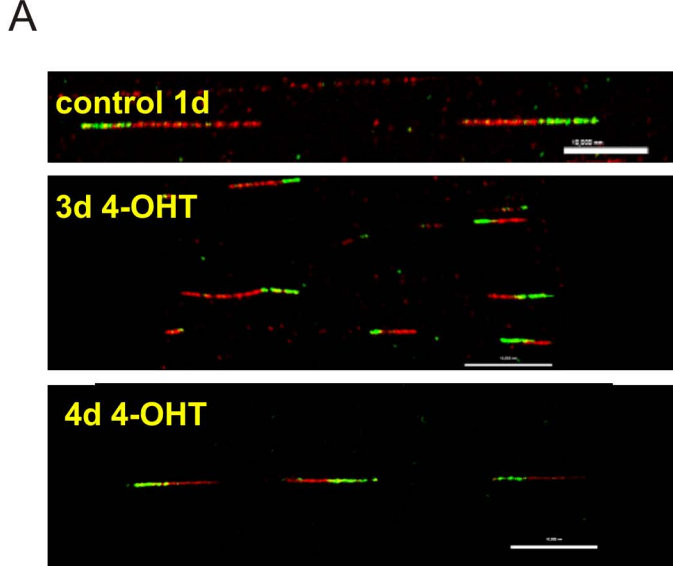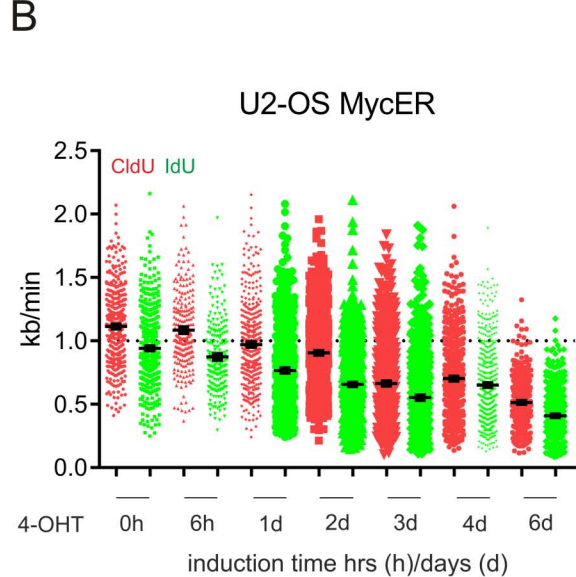

**C**

|                  | control |        | 6h 4-OHT |        | 1d 4-OHT |        | 2d 4-OHT |        | 3d 4-OHT |        | 4d 4-OHT |        | 6d 4OHT |        |
|------------------|---------|--------|----------|--------|----------|--------|----------|--------|----------|--------|----------|--------|---------|--------|
| Number of values | 456     | 456    | 219      | 219    | 440      | 440    | 523      | 523    | 467      | 467    | 554      | 554    | 450     | 450    |
|                  | CT CldU | CT IdU | 6h       | 6h     | 24h      | 24h    | 48h      | 48h    | 72h      | 72h    | 96h      | 96h    | 144h    | 144h   |
| Mean             | 1.113   | 0.9415 | 1.085    | 0.8730 | 0.9701   | 0.7661 | 0.9052   | 0.6566 | 0.6634   | 0.5526 | 0.7027   | 0.6510 | 0.5144  | 0.4092 |
| Std. Deviation   | 0.2783  | 0.2980 | 0.3123   | 0.2822 | 0.3228   | 0.3365 | 0.2902   | 0.2665 | 0.3196   | 0.3285 | 0.3216   | 0.3081 | 0.1943  | 0.1924 |

Supplemental Fig 4.
